# Supplementary material for: Phosphorylation of TGB1 by protein kinase CK2 promotes barley stripe mosaic virus movement in monocots and dicots
Source: PubMed Central journal article supplement (PMC4507770; doi:10.1093/jxb/erv237), 2015-05-21
Supplement: supp_erv237_jexbot148064_file001.pdf [file supp_erv237_jexbot148064_file001.pdf]

**A**

GPS 2.1.2 - Prediction of Kinase-specific Phosphorylation Sites

File Tools Help

**PKs**

- Phosphorylation Kinase
  - Serine/Threonine Kinase
    - AGC
    - CAMK
    - CK1
    - CMGC
    - STE
    - TKL
    - Atypical
    - Other
      - AUR
        - CK2a
        - CK2b
      - IKK
      - NEK
      - Other-Unique
      - PEK
      - PLK
      - Wnk
    - Tyrosine Kinase
      - TK

| ID      | Position | Code | Kinase               | Peptide                      | Score | Cutoff |
|---------|----------|------|----------------------|------------------------------|-------|--------|
| Unnamed | 120      | S    | STE/STE-Unique/NIK   | LKGGTKGSSQVGENV              | 10.5  | 8      |
| Unnamed | 121      | S    | STE/STE-Unique/NIK   | KGGTKGSSQVGENVS              | 11    | 8      |
| Unnamed | 6        | T    | TKL/MLK/ILK          | **MDMTKTVEEKKTN              | 3.778 | 3.556  |
| Unnamed | 49       | T    | TKL/MLK/ILK          | STSKLKE <del>T</del> LIADQTP | 4.444 | 3.556  |
| Unnamed | 82       | T    | TKL/MLK/ILK          | PGPKLAT <del>T</del> VEKEPEL | 3.889 | 3.556  |
| Unnamed | 223      | T    | TKL/MLK/ILK          | ECMARACTLERERLK              | 4.667 | 3.556  |
| Unnamed | 260      | T    | TKL/MLK/ILK          | VPGSGK <del>S</del> TIVRTLK  | 3.889 | 3.556  |
| Unnamed | 120      | S    | TKL/MLK/TAK1         | LKGGTKGSSQVGENV              | 5     | 5      |
| Unnamed | 121      | S    | Atypical/PIKK/ATR    | KGGTKGSSQVGENVS              | 9.9   | 8.11   |
| Unnamed | 145      | T    | Atypical/PIKK/FRAP   | AAKQKQKTPKSVKMQ              | 6.667 | 5.8    |
| Unnamed | 167      | S    | Other/AUR/AUR-A      | KANDTRRSELINKFQ              | 5.357 | 3.536  |
| Unnamed | 385      | S    | Other/AUR/AUR-A      | KQGNRMVSKGGRDTV              | 3.929 | 3.536  |
| Unnamed | 498      | S    | Other/AUR/AUR-A      | ASNSHRYSAKPDEDH              | 5.179 | 3.536  |
| Unnamed | 167      | S    | Other/AUR/AUR-B      | KANDTRRSELINKFQ              | 6.069 | 5.69   |
| Unnamed | 332      | S    | Other/AUR/IPL1-yeast | LQRRLRASMLLVGD               | 6.684 | 6.211  |
| Unnamed | 395      | T    | Other/CK2/CK2a       | GRDVTIITDYDGETD              | 3.691 | 2.927  |
| Unnamed | 401      | T    | Other/CK2/CK2a       | ITDYDGETDETEKNI              | 4.057 | 2.927  |
| Unnamed | 69       | S    | Other/CK2/CK2b       | GAKSKLDSDRQVPG               | 6.75  | 6.5    |
| Unnamed | 17       | S    | Other/IKK/IKKa       | KKTNGTDSVKGVPEN              | 5.111 | 4      |
| Unnamed | 44       | S    | Other/IKK/IKKa       | GGDSSTSKLKETLI               | 4     | 4      |

Enter sequence(s) in FASTA format

```
MDMTKTVEEKKTNGTDSVKGVPENSTIPKVPTGQEMGGDSSSTSKLKETLIADQTPLSVDNGAKSKLDSDDRQVPGPKLATTVEKEPELKPNV
KKSKKRIQKPAQPSRPNDLKGGTKGSSQVGENVSENYTGISKEAAKQKQTPKSVKMQSNLADKFKANDTRRSELINKFQQFVHETCLKSDF
EYTGRQYFRARSNFFEMIKLASLYDKHLKECMARACTLERERLKRKLLLVRLKPAVDFLTGIISGVPGSGCKSTIVRTLKGEFPAVCALANPALM
NDYSGIEGVYGLDDLLLSAVPITSDLLIIDEYTLAESAEILLQRRLRASMVLLVGDVAQGKATTASSIEYLTPVIYRSETTYRLGQETASLCSKQ
GNRMVSKGGRDTVITDYDGETDETEKNIAFTVDTVRDVKDCGYDCALAIDVQKEFDSVTLFLRNERDKALADKHLRLVALSRHKSLIIRA
DAEIRQAFLTGDIDLSSKASNSHRYSAKPDEDHSFWAK
```

Threshold:  High \*  Medium  Low  All

Console: Example Clear Submit

\* Threshold setting is HIGH (FPRs of 2% for Ser/Thr kinases, FPRs of 4% for Tyr kinases)

**B**

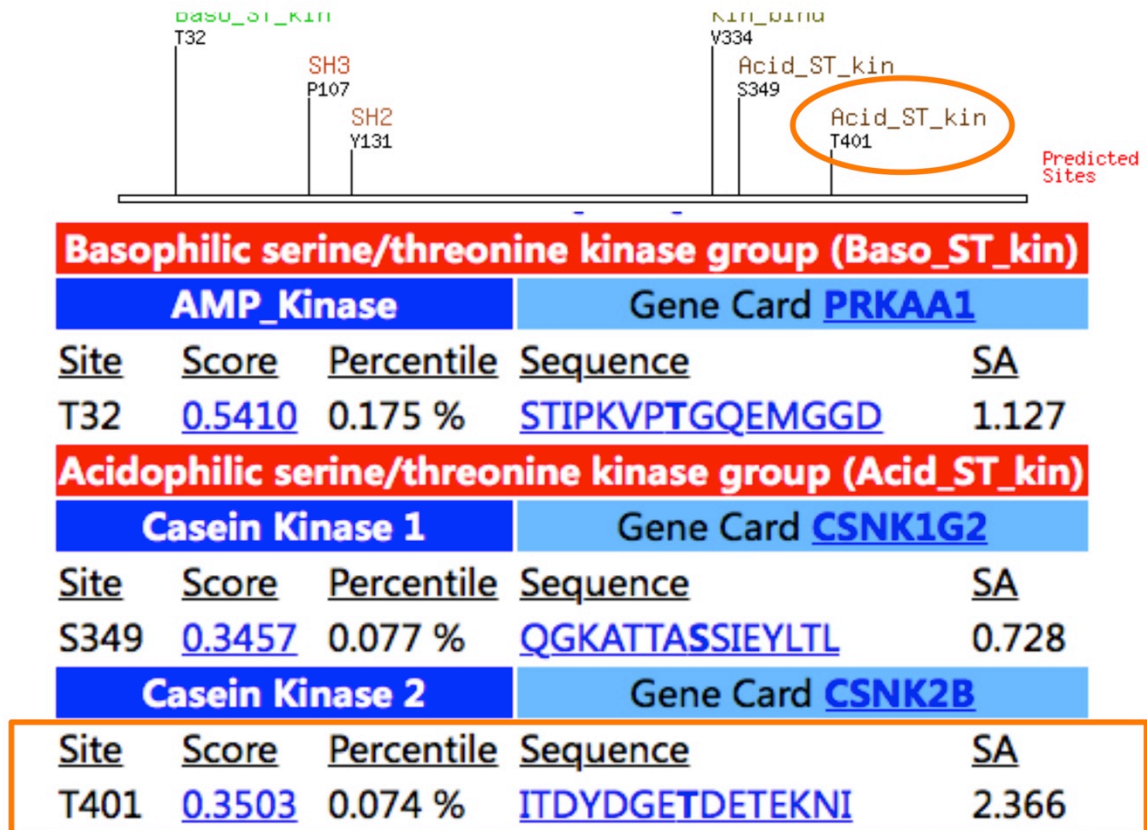

**Fig. S1** Phosphorylation predictions of the  $x_J$ TGB1 protein by the GPS 2.1 program (A) and the Scansite Motif Scanner online server (B).



**Table S1** Primers used in construction and analysis of biologically active BSMV Xinjiang cDNA clones

| Primer      | Primer sequence (5'-3') <sup>a</sup>        | Position and description <sup>b</sup>                                                  | Purpose                                                                                                                                        |
|-------------|---------------------------------------------|----------------------------------------------------------------------------------------|------------------------------------------------------------------------------------------------------------------------------------------------|
| XJ-1        | TGTAATACGACTCACTATAGGTATGTAAGTTGCCTTTGGGTG  | x <sub>J</sub> BSMV RNA $\alpha$ nt 1-22                                               | pT7 $\alpha$ <sub>x<sub>J</sub></sub> construction in combination with BS-32                                                                   |
| XJ-2        | TGTAATACGACTCACTATAGGTAAAAGAAAAGGAACAACCCTG | x <sub>J</sub> BSMV RNA $\beta$ nt 1-23                                                | pT7 $\beta$ <sub>x<sub>J</sub></sub> construction in combination with BS-32                                                                    |
| XJ-3        | TGTAATACGACTCACTATAGGTATAGCTTGAGCATTACCGTC  | x <sub>J</sub> BSMV RNA $\gamma$ nt 1-22                                               | pT7 $\gamma$ <sub>x<sub>J</sub></sub> construction in combination with BS-32                                                                   |
| CH-10       | GTATGTAAGTTGCCTTTGGGTGTA                    | x <sub>J</sub> BSMV RNA $\alpha$ nt 1-24                                               | pCaBS- $\alpha$ <sub>x<sub>J</sub></sub> construction in combination with BS-26                                                                |
| CH-11       | GTAAAAGAAAAGGAACAACCCTGT                    | x <sub>J</sub> BSMV RNA $\beta$ nt 1-24                                                | pCaBS- $\beta$ <sub>x<sub>J</sub></sub> and its mutants construction in combination with BS-26                                                 |
| CH-12       | GTATAGCTTGAGCATTACCGTCGT                    | x <sub>J</sub> BSMV RNA $\gamma$ nt 1-24                                               | pCaBS- $\gamma$ <sub>x<sub>J</sub></sub> construction in combination with BS-26                                                                |
| BS-26       | CGGGATCCTGGTCTTCCCTTGGGGGAC                 | x <sub>J</sub> BSMV RNA $\gamma$ nt 2793-2775 (common to the 3' termini of BSMV gRNAs) | pCaBS- $\alpha$ <sub>x<sub>J</sub></sub> , pCaBS- $\beta$ <sub>x<sub>J</sub></sub> , and pCaBS- $\gamma$ <sub>x<sub>J</sub></sub> construction |
| BS-10       | GGTGCTTGATGCTTTGGATAAGG                     | x <sub>J</sub> BSMV RNA $\gamma$ nt 1864-1886                                          | verification of BSMV genome by RT-PCR                                                                                                          |
| BS-32       | TGGTCTTCCCTTGGGGGAC                         | x <sub>J</sub> BSMV RNA $\gamma$ nt 2790-2772                                          |                                                                                                                                                |
| TGB1-XhoIF  | CCGCTCGAGCTATGGACATGACGAAAAGTGTGAGG         | x <sub>J</sub> TGB1 nt 1-25                                                            | pGDG-x <sub>J</sub> TGB1 and its mutants construction                                                                                          |
| TGB1-BamHIR | CGGGATCCTTATTTGGCCTGAACCAACTGTGG            | x <sub>J</sub> TGB1 nt 1536-1512                                                       |                                                                                                                                                |
| TGB2-XhoIF  | CCGCTCGAGCTATGAAGACCACAGTTG                 | x <sub>J</sub> TGB2 nt 1-16                                                            | pGD-x <sub>J</sub> TGB2 construction                                                                                                           |
| TGB2-BamHIR | CGGGATCCCTAGCCAATATCGCATAG                  | x <sub>J</sub> TGB2 nt 395-379                                                         |                                                                                                                                                |

| <b>Primer</b>         | <b>Primer sequence (5'-3')<sup>a</sup></b> | <b>Position and description<sup>b</sup></b> | <b>Purpose</b>                             |
|-----------------------|--------------------------------------------|---------------------------------------------|--------------------------------------------|
| TGB3-XhoIF            | CCGCTCGAGCTATGGCAATGCCTCATC                | xJ TGB3 nt 1-16                             | pGDG-xJ TGB3 and pGDR-xJ TGB3 construction |
| TGB3-BamHIR           | CGGGATCCTTACCTTTTTGAAGAAAG                 | xJ TGB3 nt 469-451                          |                                            |
| TGB1-NdeIF            | GGAATTCCATATGATGGACATGACGAAAACCTG          | xJ TGB1 nt 1-19                             | pET-xJ TGB1 construction                   |
| TGB1-XhoIR            | CCGCTCGAGTTTGGCCTTGAACCAAC                 | xJ TGB1 nt 1533-1517                        |                                            |
| TGB3-BamHIF           | CGGGATCCATGGCAATGCCTCATC                   | xJ TGB3 nt 1-16                             | pGEX-xJ TGB3 construction                  |
| TGB3-XhoIR            | CCGCTCGAGTTACCTTTTTGAAGAAAG                | xJ TGB3 nt 468-451                          |                                            |
| NbCK2 $\alpha$ -NdeIF | GGAATTCCATATGATGTCAAAGCTCGTG               | NbCK2 $\alpha$ nt 1-16                      | pET- NbCK2 $\alpha$ construction           |
| NbCK2 $\alpha$ -XhoIR | CAACTCGAGCTGCGTCCTCATCC                    | NbCK2 $\alpha$ nt 999-986                   |                                            |
| HvCK2 $\alpha$ -NdeIF | GGAATTCCATATGATGTGGAAGGCGAGGGTC            | HvCK2 $\alpha$ nt 148-165                   | pET- HvCK2 $\alpha$ construction           |
| HvCK2 $\alpha$ -SalIR | GCGTCGACTTGCGGTCGTGC                       | HvCK2 $\alpha$ nt 1146-1135                 |                                            |

<sup>a</sup> Underlined letters indicate restriction enzyme sites, gray covered letters show T7 promoter sequence.

<sup>b</sup> Numbers correspond to target nucleotide positions; a reverse order of numbers indicates that the primer is complementary to the targeted sequences.

**Table S2** Primers used for site-specific mutagenesis of Xinjiang RNA $\beta$  clones

| <b>Primer</b>   | <b>Primer sequence (5'-3')<sup>a</sup></b>                     | <b>Position and description<sup>b</sup></b>  | <b>Purpose</b>                                                                                                                   |
|-----------------|----------------------------------------------------------------|----------------------------------------------|----------------------------------------------------------------------------------------------------------------------------------|
| T395A-F         | GGGACACAGTGATCATT <u>G</u> CTGATTACGATGGCG                     | x <sub>J</sub> BSMV RNA $\beta$ nt 1958-1990 | pT7 $\beta$ <sub>x<sub>J</sub></sub> TGB1 <sub>T395A</sub> and pET-x <sub>J</sub> TGB1 <sub>T395A</sub> construction             |
| T395A-R         | CGCCATCGTAATCAGCAATGATCACTGTGTCCC                              | x <sub>J</sub> BSMV RNA $\beta$ nt 1990-1958 |                                                                                                                                  |
| T395D-F         | GGAAGGGACACAGTGATCATT <u>G</u> ATGATTACGATGGCGAAACAG           | x <sub>J</sub> BSMV RNA $\beta$ nt 1954-1996 | pT7 $\beta$ <sub>x<sub>J</sub></sub> TGB1 <sub>T395D</sub> and pET-x <sub>J</sub> TGB1 <sub>T395D</sub> construction             |
| T395D-R         | CTGTTTCGCCATCGTAATCA <u>T</u> CAATGATCACTGTGTCCCTTC            | x <sub>J</sub> BSMV RNA $\beta$ nt 1996-1954 |                                                                                                                                  |
| T395E-F         | GGAAGGGACACAGTGATCATT <u>G</u> AAGATTACGATGGCGAAACAG           | x <sub>J</sub> BSMV RNA $\beta$ nt 1954-1996 | pT7 $\beta$ <sub>x<sub>J</sub></sub> TGB1 <sub>T395E</sub> and pET-x <sub>J</sub> TGB1 <sub>T395E</sub> construction             |
| T395E-R         | CTGTTTCGCCATCGTAATC <u>T</u> TCAATGATCACTGTGTCCCTTC            | x <sub>J</sub> BSMV RNA $\beta$ nt 1996-1954 |                                                                                                                                  |
| T401A-F         | GATTACGATGGCGAAG <u>C</u> AGATGAAACGGAGAAAAATATCG              | x <sub>J</sub> BSMV RNA $\beta$ nt 1978-2017 | pT7 $\beta$ <sub>x<sub>J</sub></sub> TGB1 <sub>T401A</sub> and pET-x <sub>J</sub> TGB1 <sub>T401A</sub> construction             |
| T401A-R         | CGATATTTTCTCCGTTTCATCTG <u>C</u> TTCGCCATCGTAATC               | x <sub>J</sub> BSMV RNA $\beta$ nt 2017-1978 |                                                                                                                                  |
| T401D-F         | GATTACGATGGCGAAG <u>A</u> CGATGAAACGGAGAAAAATATCG              | x <sub>J</sub> BSMV RNA $\beta$ nt 1978-2017 | pT7 $\beta$ <sub>x<sub>J</sub></sub> TGB1 <sub>T401D</sub> and pET-x <sub>J</sub> TGB1 <sub>T401D</sub> construction             |
| T401D-R         | CGATATTTTCTCCGTTTCATC <u>G</u> TCTTCGCCATCGTAATC               | x <sub>J</sub> BSMV RNA $\beta$ nt 2017-1978 |                                                                                                                                  |
| T401E-F         | GATTACGATGGCGAAG <u>A</u> AGATGAAACGGAGAAAAATATCG              | x <sub>J</sub> BSMV RNA $\beta$ nt 1978-2017 | pT7 $\beta$ <sub>x<sub>J</sub></sub> TGB1 <sub>T401E</sub> and pET-x <sub>J</sub> TGB1 <sub>T401E</sub> construction             |
| T401E-R         | CGATATTTTCTCCGTTTCATC <u>T</u> TCTTCGCCATCGTAATC               | x <sub>J</sub> BSMV RNA $\beta$ nt 2017-1978 |                                                                                                                                  |
| T395A/ T401A -F | CACAGTGATCATT <u>G</u> CTGATTACGATGGCGAAG <u>C</u> AGATGAAACGG | x <sub>J</sub> BSMV RNA $\beta$ nt 1962-2005 | pT7 $\beta$ <sub>x<sub>J</sub></sub> TGB1 <sub>T395A/T401A</sub> and pET-x <sub>J</sub> TGB1 <sub>T395A/T401A</sub> construction |
| T395A/ T401A -R | CCGTTTCATCTG <u>C</u> TTCGCCATCGTAATCAGCAATGATCACTGTG          | x <sub>J</sub> BSMV RNA $\beta$ nt 2005-1962 |                                                                                                                                  |
| T395D/ T401A -F | CACAGTGATCATT <u>G</u> ATGATTACGATGGCGAAG <u>C</u> AGATGAAACGG | x <sub>J</sub> BSMV RNA $\beta$ nt 1962-2005 | pT7 $\beta$ <sub>x<sub>J</sub></sub> TGB1 <sub>T395D/T401A</sub> and pET-x <sub>J</sub> TGB1 <sub>T395D/T401A</sub> construction |
| T395D/ T401A -R | CCGTTTCATCTG <u>C</u> TTCGCCATCGTAATCA <u>T</u> CAATGATCACTGTG | x <sub>J</sub> BSMV RNA $\beta$ nt 2005-1962 |                                                                                                                                  |

|                 |                                                                               |                                             |                                                                                                                             |
|-----------------|-------------------------------------------------------------------------------|---------------------------------------------|-----------------------------------------------------------------------------------------------------------------------------|
| T395E/ T401A -F | CACAGTGATCATT <u><b>GAAG</b></u> ATTACGATGGCGA <u><b>AG</b></u> CAGATGAAACGG  | <sub>XJ</sub> BSMV RNA $\beta$ nt 1962-2005 | pT7 $\beta$ <sub>XJ</sub> TGB1 <sub>T395E/T401A</sub> and<br>pET- <sub>XJ</sub> TGB1 <sub>T395E/T401A</sub><br>construction |
| T395E/ T401A -R | CCGTTTCATCTG <u><b>C</b></u> TTTCGCCATCGTAATC <u><b>TTC</b></u> AATGATCACTGTG | <sub>XJ</sub> BSMV RNA $\beta$ nt 2005-1962 |                                                                                                                             |

<sup>a</sup> Underlined and bold letters indicate sequences altered by site-specific mutagenesis.

<sup>b</sup> Numbers correspond to target nucleotide positions; a reverse order of numbers indicates that the primer is complementary to the targeted sequences.

**Table S3** Sequence alignment of Xinjiang strain RNA $\alpha$  with different BSMV strains

| Identity of sequences (%) |             |       |            |
|---------------------------|-------------|-------|------------|
| Strain                    | Full length |       | $\alpha$ a |
|                           | nt          | nt    | aa         |
| ND18                      | 99.82       | 99.85 | 99.65      |
| Type                      | 99.66       | 99.82 | 99.56      |
| Norwich                   | 98.52       | 98.51 | 98.77      |
| Beijing                   | 95.18       | 94.96 | 96.66      |

**Table S4** Sequence alignment of Xinjiang strain RNA $\beta$  with different BSMV strains

| Identity of sequences (%) |             |       |           |       |       |       |       |       |       |    |
|---------------------------|-------------|-------|-----------|-------|-------|-------|-------|-------|-------|----|
| Strain                    | Full length |       | $\beta$ a |       | TGB1  |       | TGB2  |       | TGB3  |    |
|                           | nt          | nt    | nt        | aa    | nt    | aa    | nt    | aa    | nt    | aa |
| ND18                      | 99.23       | 99.83 | 99.49     | 99.67 | 99.41 | 100   | 100   | 99.78 | 100   |    |
| Type                      | 99.41       | 100   | 100       | 99.67 | 99.22 | 99.75 | 100   | 100   | 100   |    |
| Norwich                   | 95.85       | 99.16 | 100       | 95.72 | 93    | 97.2  | 99.24 | 95.27 | 93.55 |    |
| Beijing                   | 94.08       | 92.42 | 92.42     | 95.39 | 93.76 | 96.69 | 99.24 | 96.13 | 94.19 |    |

**Table S5** Sequence alignment of Xinjiang strain RNA $\gamma$  with different BSMV strains

| Identity of sequences (%) |             |       |            |       |            |
|---------------------------|-------------|-------|------------|-------|------------|
| Strain                    | Full length |       | $\gamma$ a |       | $\gamma$ b |
|                           | nt          | nt    | nt         | aa    | aa         |
| ND18                      | 98.78       | 98.92 | 99.38      | 97.6  | 96.73      |
| Type                      | 87.82       | 83.74 | 83.83      | 99.35 | 99.35      |
| Norwich                   | 98.5        | 98.77 | 99.54      | 97.42 | 98.69      |
| Beijing                   | 94.36       | 95.02 | 96.92      | 94.55 | 94.12      |

**Table S6** Systemic infectivity efficiency of  $\chi$ JBSMV phosphorylation related mutants on hosts

| <b>Systemic infectivity efficiency on <i>Nicotiana benthamiana</i></b> |                                |     |       |       |       |       |       |       |                |                |                |
|------------------------------------------------------------------------|--------------------------------|-----|-------|-------|-------|-------|-------|-------|----------------|----------------|----------------|
|                                                                        | Mock                           | WT  | T395A | T395D | T395E | T401A | T401D | T401E | T395A<br>T401A | T395D<br>T401A | T395E<br>T401A |
| Exp. 1                                                                 | 0 <sup>a</sup> /8 <sup>b</sup> | 7/8 | 6/8   | 0/8   | 0/8   | 0/8   | 0/8   | 0/8   | 0/8            | 0/8            | 0/8            |
| Exp. 2                                                                 | 0/8                            | 7/8 | 6/8   | 0/8   | 0/8   | 0/8   | 0/8   | 0/8   | 0/8            | 0/8            | 0/8            |
| Exp. 3                                                                 | 0/8                            | 7/8 | 5/8   | 0/8   | 0/8   | 0/8   | 0/8   | 0/8   | 0/8            | 0/8            | 0/8            |

  

| <b>Systemic infectivity efficiency on barley</b> |      |     |       |       |       |       |       |       |                |                |                |
|--------------------------------------------------|------|-----|-------|-------|-------|-------|-------|-------|----------------|----------------|----------------|
|                                                  | Mock | WT  | T395A | T395D | T395E | T401A | T401D | T401E | T395A<br>T401A | T395D<br>T401A | T395E<br>T401A |
| Exp. 1                                           | 0/8  | 6/8 | 5/8   | 0/8   | 4/8   | 1/8   | 0/8   | 4/8   | 0/8            | 0/8            | 0/8            |
| Exp. 2                                           | 0/8  | 6/8 | 3/8   | 0/8   | 2/8   | 2/8   | 0/8   | 1/8   | 0/8            | 0/8            | 0/8            |
| Exp. 3                                           | 0/8  | 6/8 | 4/8   | 0/8   | 4/8   | 1/8   | 0/8   | 4/8   | 0/8            | 0/8            | 0/8            |

  

| <b>Systemic infectivity efficiency on wheat</b> |      |     |       |       |       |       |       |       |                |                |                |
|-------------------------------------------------|------|-----|-------|-------|-------|-------|-------|-------|----------------|----------------|----------------|
|                                                 | Mock | WT  | T395A | T395D | T395E | T401A | T401D | T401E | T395A<br>T401A | T395D<br>T401A | T395E<br>T401A |
| Exp. 1                                          | 0/8  | 7/8 | 6/8   | 0/8   | 6/8   | 4/8   | 0/8   | 5/8   | 0/8            | 0/8            | 0/8            |
| Exp. 2                                          | 0/8  | 7/8 | 5/8   | 0/8   | 5/8   | 3/8   | 0/8   | 5/8   | 0/8            | 0/8            | 0/8            |
| Exp. 3                                          | 0/8  | 8/8 | 6/8   | 0/8   | 5/8   | 2/8   | 0/8   | 4/8   | 0/8            | 0/8            | 0/8            |

<sup>a</sup> numbers of systemically infected plants<sup>b</sup> numbers of the total inoculated plants
